# Supplementary material for: Fabrication of helical hybrid silica bundles
Source: Royal Society of Chemistry journal article supplement (doi:10.1039/b700615b), 2007-01-01
Supplement: b700615b.pdf [file b700615b.pdf]

## Fabrication of helical hybrid silica bundles

Yonggang Yang<sup>\*a</sup>, Miho Nakazawa<sup>b</sup>, Masahiro Suzuki<sup>b</sup>, Hirofusa Shirai<sup>b</sup> and Kenji Hanabusa<sup>\*b</sup>

<sup>a</sup> School of Chemistry and Chemical Engineering, Suzhou University, Suzhou 215123, P.R. China. E-mail: ygyang@suda.edu.cn

<sup>b</sup> Department of Functional Polymer Science, Faculty of Textile Science and Technology, Shinshu University, Ueda 386-8567, Japan. E-mail: hanaken@gipstc.shinshu-u.ac.jp

| Solvents      | LL-12      | LL-10        | LL-9       | LL-8       | LL-7       | LL-6       |
|---------------|------------|--------------|------------|------------|------------|------------|
| Water         | I          | I            | I          | I          | I          | I          |
| Hexane        | I          | I            | I          | I          | I          | I          |
| Cyclohexane   | I          | I            | I          | I          | I          | I          |
| Ethyl acetate | I          | I            | I          | I          | I          | I          |
| Acetone       | I          | I            | I          | I          | I          | I          |
| Acetonitrile  | I          | I            | I          | I          | I          | I          |
| Methanol      | P          | O-gel(100)→P | P          | Tl-gel(60) | P          | S(50)      |
| Ethanol       | Tl-gel(40) | Tl-gel(30)→P | G(50)→P    | Tl-gel(30) | P          | PG(50)     |
| 1-Propanol    | Tl-gel(40) | G-gel(60)→P  | G(50)→P    | Tl-gel(30) | P          | PG(50)     |
| 1-Butanol     | Tl-gel(40) | Tl-gel(50)→P | Tl-gel(45) | Tl-gel(30) | PG(50)     | PG(50)     |
| Cyclohexanone | Tl-gel(8)  | Tl-gel(10)   | Tl-gel(10) | Tl-gel(15) | Tl-gel(20) | Tl-gel(10) |
| THF           | LG(50)     | Tl-gel(10)   | PG(20*)    | Tl-gel(10) | PG(20*)    | PG(20*)    |
| 1,4-Dioxane   | Tl-gel(10) | Tl-gel(10)   | O-gel(10)  | Tl-gel(15) | Tl-gel(20) | Tl-gel(20) |
| Toluene       | T-gel(5)   | T-gel(5)     | T-gel(30)  | T-gel(10)  | T-gel(15)  | LG(25*)    |
| Chlorobenzene | LG(T 50)   | T-gel(5)     | Tl-gel(20) | T-gel(5)   | Tl-gel(30) | T-gel(30)  |
| Nitrobenzene  | Tl-gel(25) | Tl-gel(10)   | Tl-gel(20) | Tl-gel(20) | Tl-gel(35) | Tl-gel(20) |
| DMF           | O-gel(15)  | Tl-gel(30)   | PG(50)     | Tl-gel(30) | PG(50)     | Tl-gel(40) |
| DMSO          | Tl-gel(40) | T-gel(40)    | PG(50)     | T-gel(40)  | PG(50)     | S(50)      |
| Chloroform    | T-gel(15)  | T-gel(20)    | VS(50)     | T-gel(30)  | S(50)      | T-gel(30)  |

**Table S1** Gelation properties and MGCs (mg/mL) of the silsesquioxanes.

T-gel; Transparent gel, Tl-gel; Translucent gel, O-gel; Opaque gel

S; Soluble, I; Insoluble, P; Precipitated, LG; Loose gel, PG; Partial gel, VS; Viscous solution

(\*); Almost insoluble at the concentration above values.

→; Overnight.

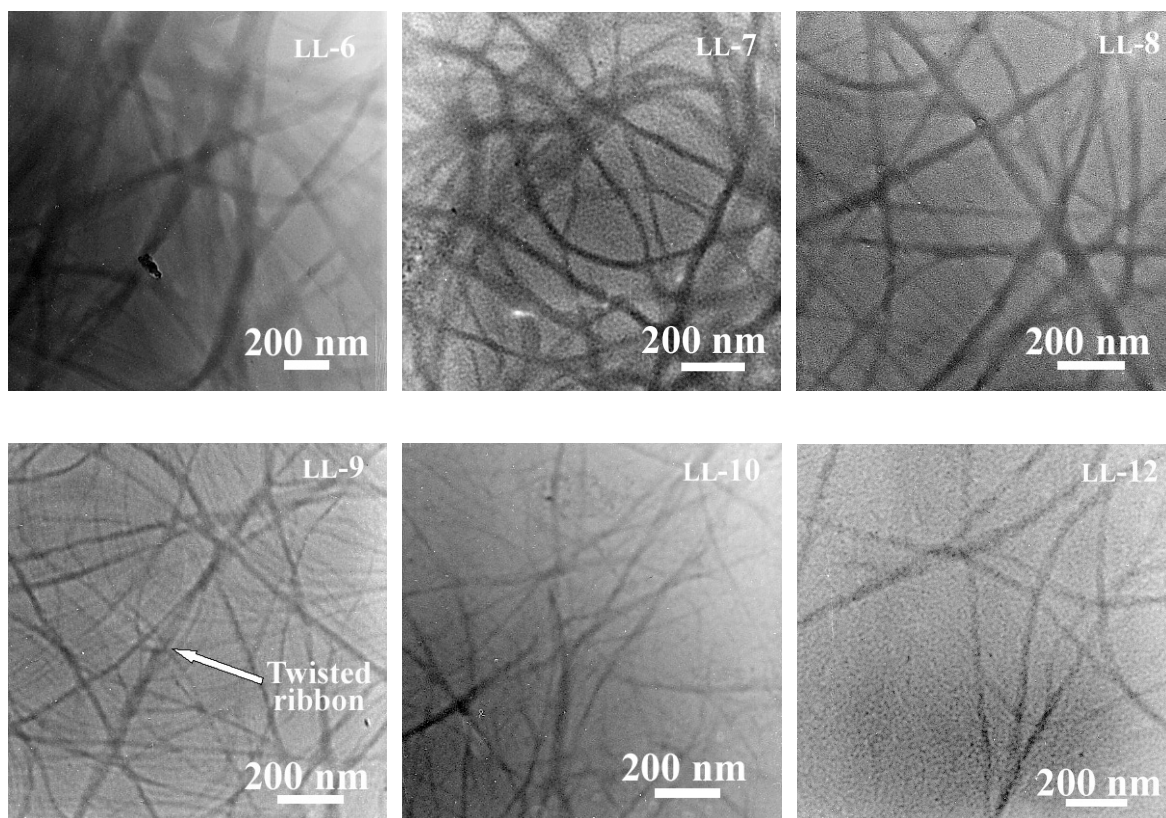

**Figure S1.** TEM images of the xerogel of the silisequioxanes prepared in dioxane (1 or 2 mg/mL).

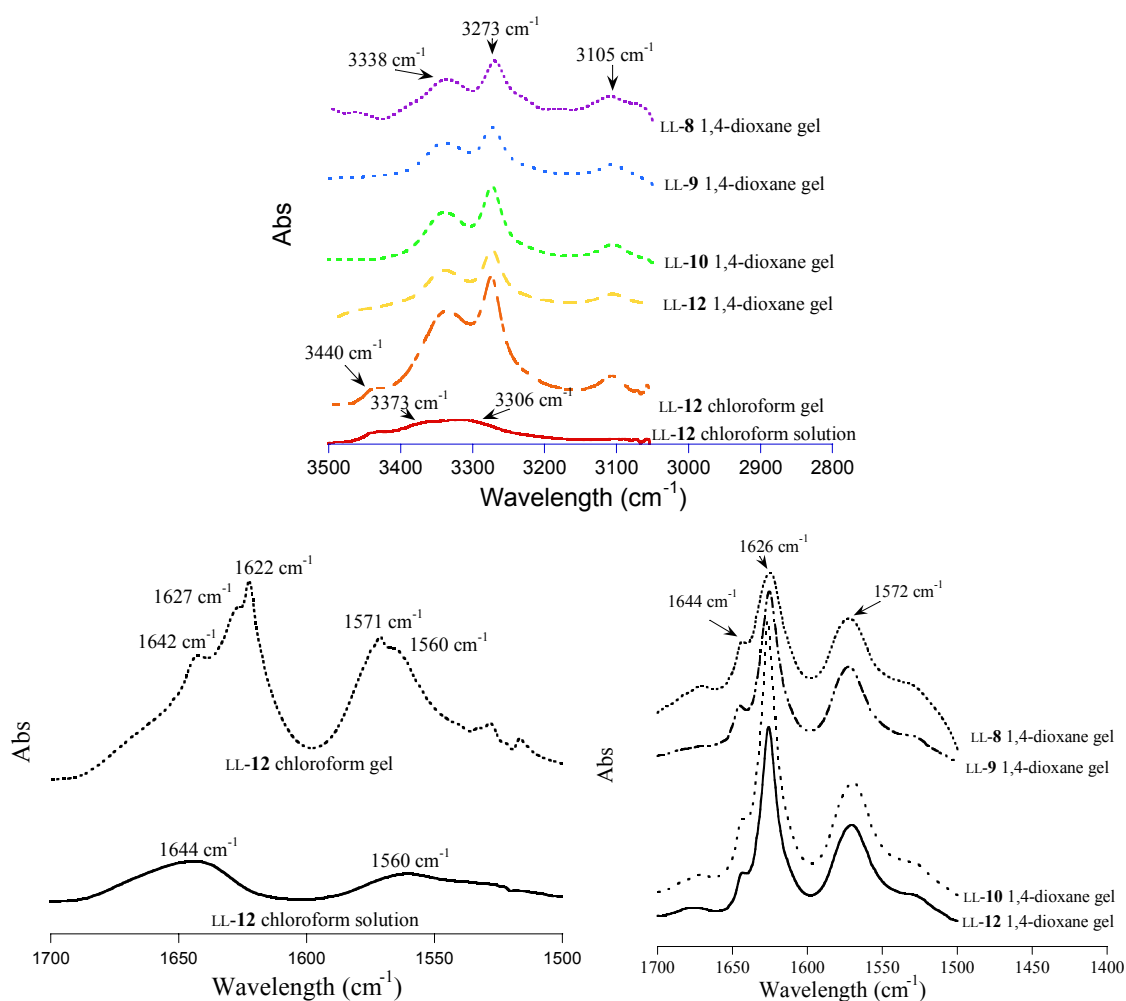

**Figure S2.** FT-IR spectra of the silsesquioxane in chloroform solution, chloroform gel and 1,4-dioxane gels (Concentration: LL-12 chloroform solution: 5.0 mg/mL; LL-12 chloroform gel: 20 mg/mL; 1,4-dioxane gels: 5.0 mg/mL).

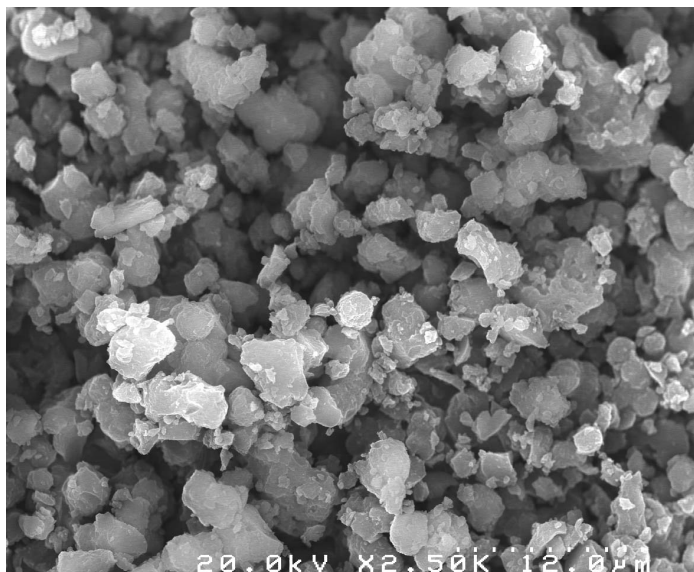

**Fig. S3.** FESEM image of LL-H6 (preparation condition: 20 mg of LL-6, 1.0 mL of 1,4-dioxane, and 1.0 mL of 4.0 M HCl aq.).

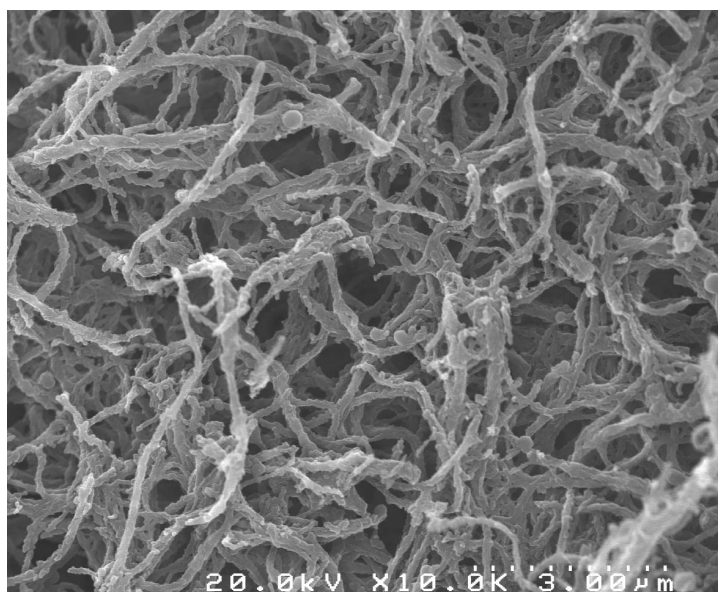

**Fig. S4.** FESEM image of LL-H7 (preparation condition: 20 mg of LL-7, 1.0 mL of 1,4-dioxane, and 1.0 mL of 4.0 M HCl aq.).

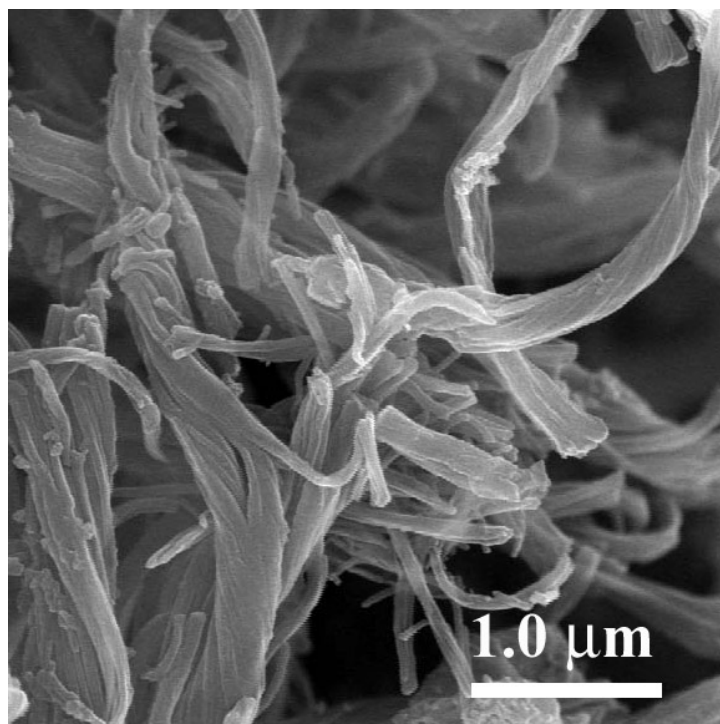

**Fig. S5.** FESEM image of LL-H12 by **Method 3** (Preparation condition: 100 mg of LL-12, 1.0 mL of 1,4-dioxane, and 1.0 mL of 1.0 M HaOH aq.).

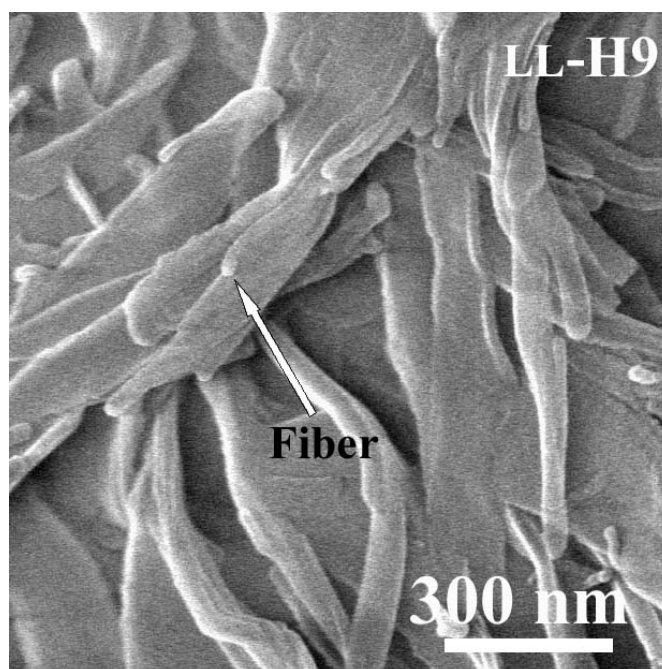

**Fig. S6.** FESEM image of LL-H9 by **Method 4** (Preparation condition: 20 mg of LL-9, 1.0 mL of 1,4-dioxane, and 1.0 mL of 1.0 M HaOH aq.).

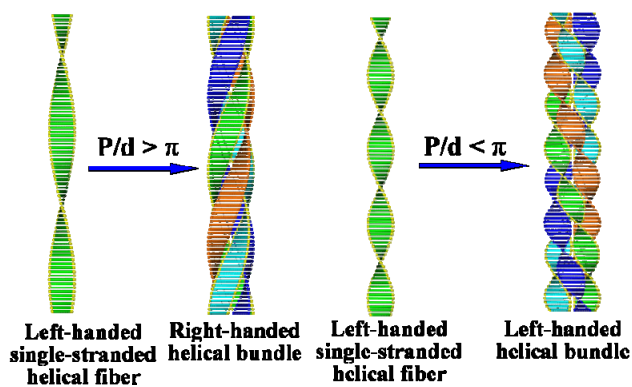

Fig. S7. Plausible model for formation of helical bundles.

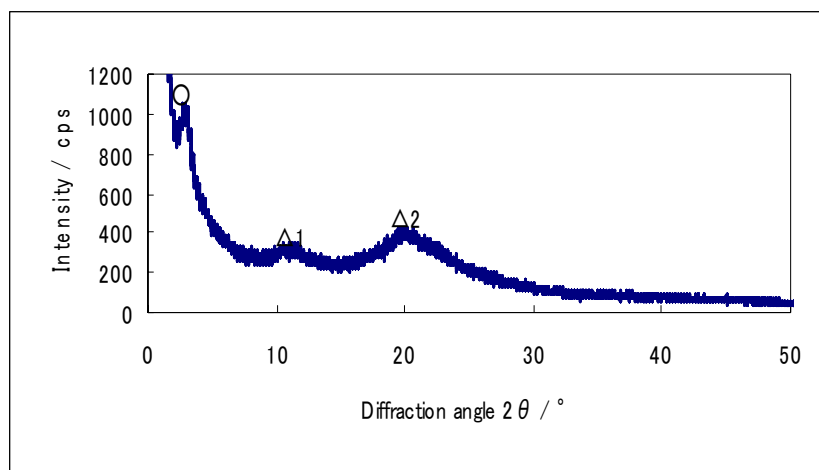

Fig. S8. Wide angle X-ray diffraction graphs of hybrid silica. (Acidic catalysis condition: 50 mg of LL-12, 1.0 mL of 1,4-dioxane, and 1.0 mL of 4.0 M HCl.)

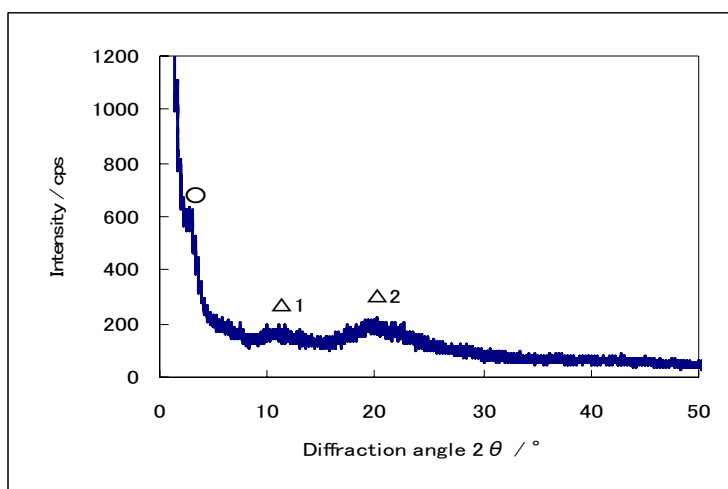

**Fig. S9.** Wide angle X-ray diffraction graphs of hybrid silica. (Basic condition: 25 mg of LL-12, 1.0 mL of 1,4-dioxane, and 1.0 mL of 1.0 M NaOH)

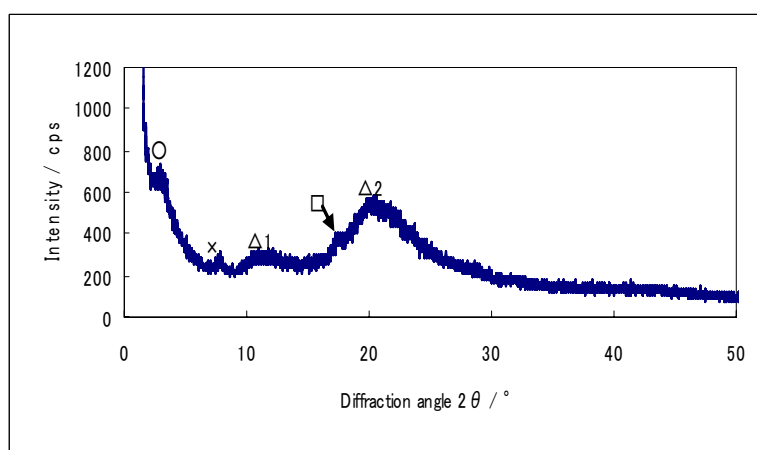

**Fig. S10.** Wide angle X-ray diffraction graphs of hybrid silica. (TBAF condition: 100 mg of LL-12, 1.0 mL of dioxane, and 1.0 mL of 0.05 M TBAF)

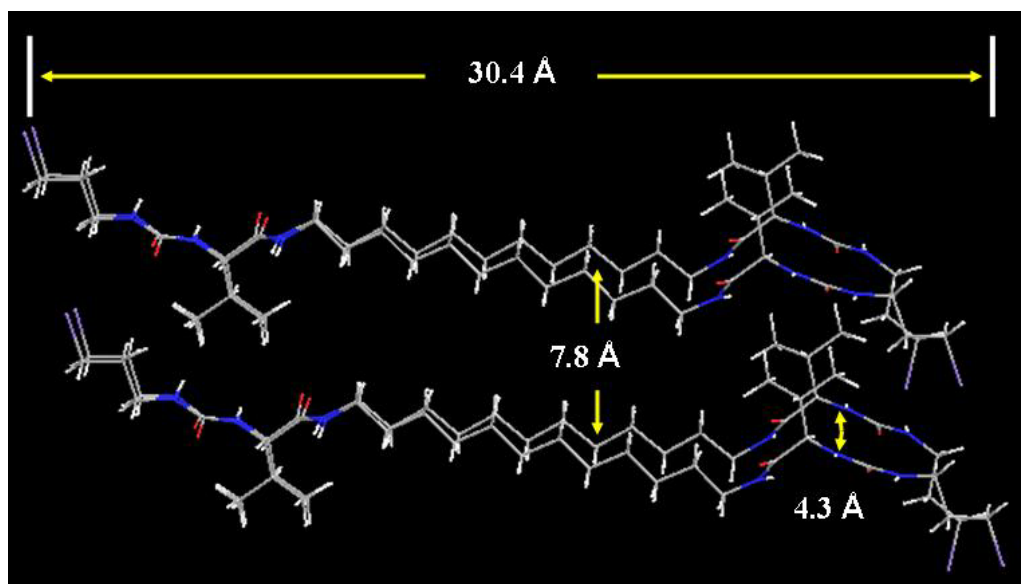

Fig. S11. Structure model of polysilsesquioxane LL-H12.

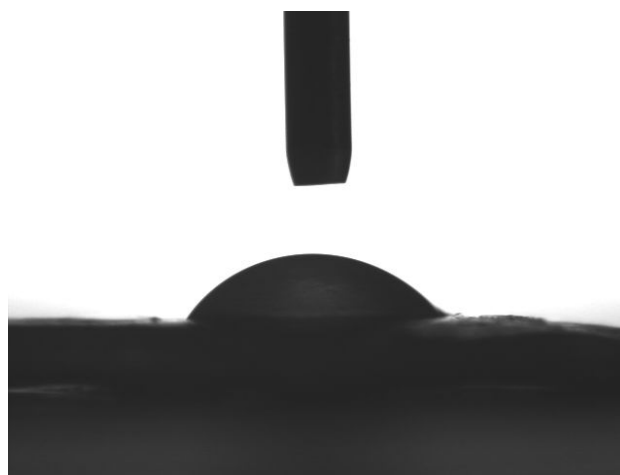

Fig. S12. Shape of a water droplet on the surface of DD-H12 thin film.
